# Supplementary material for: Association between orthostatic blood pressure dysregulation and geriatric syndromes: a cross-sectional study
Source: PubMed Central journal article supplement (PMC8881862; doi:10.1186/s12877-022-02844-8), 2022-02-26

**A**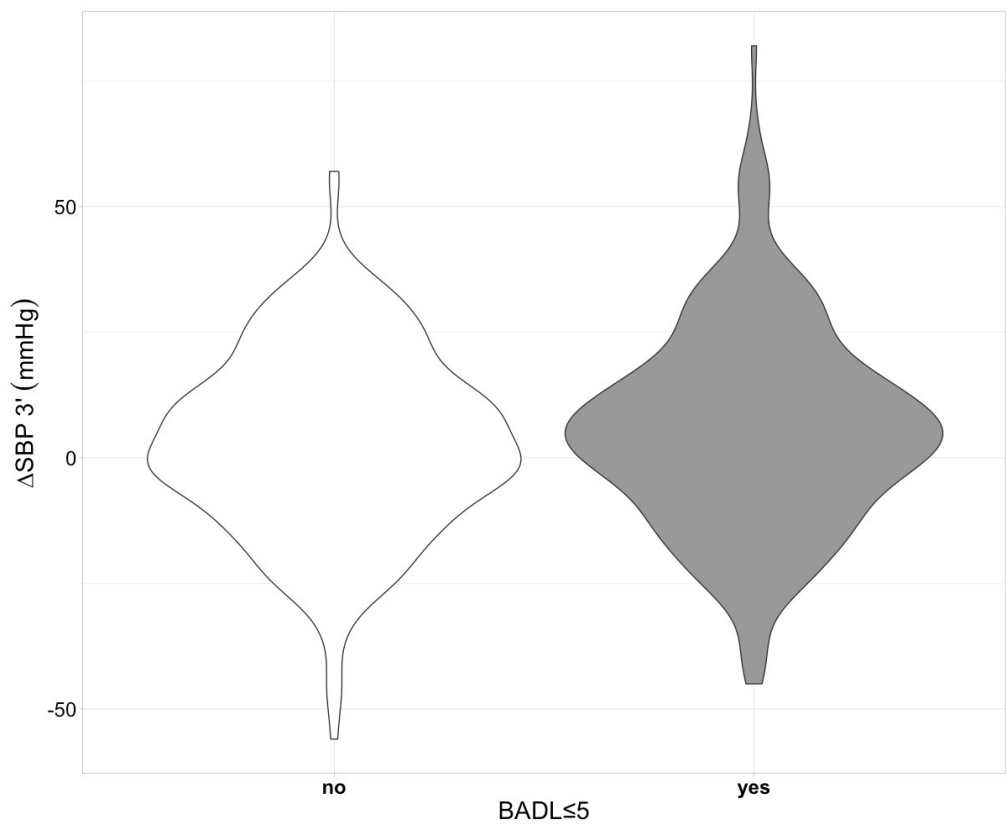**B**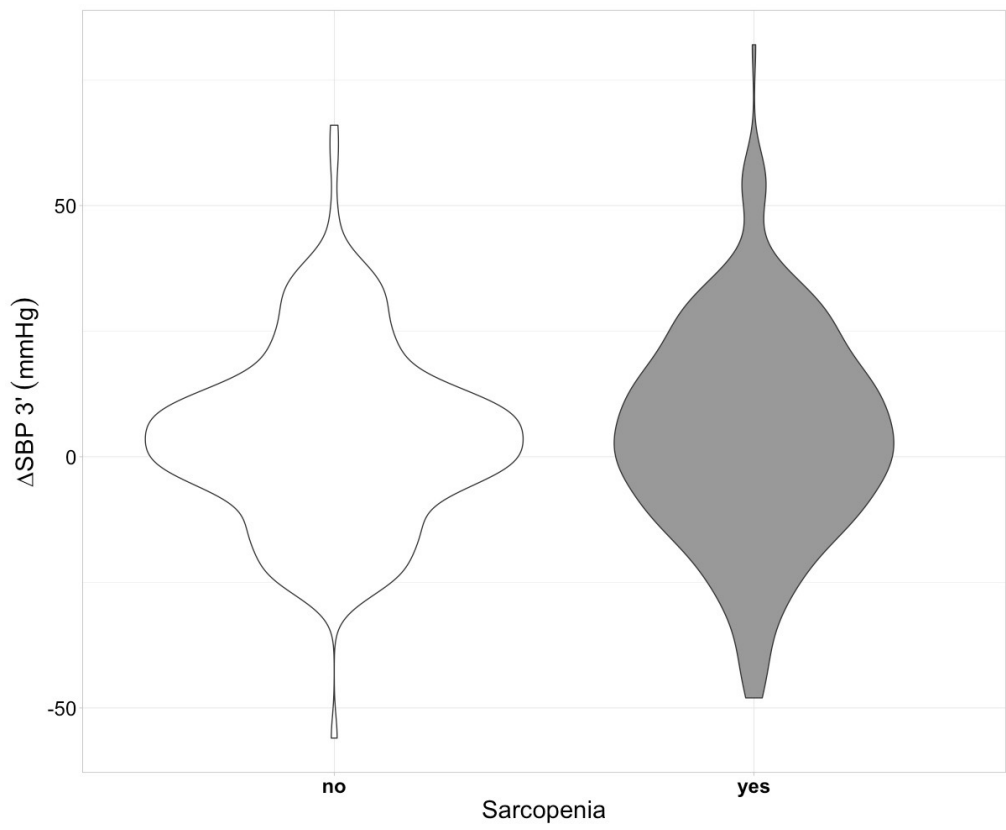**C**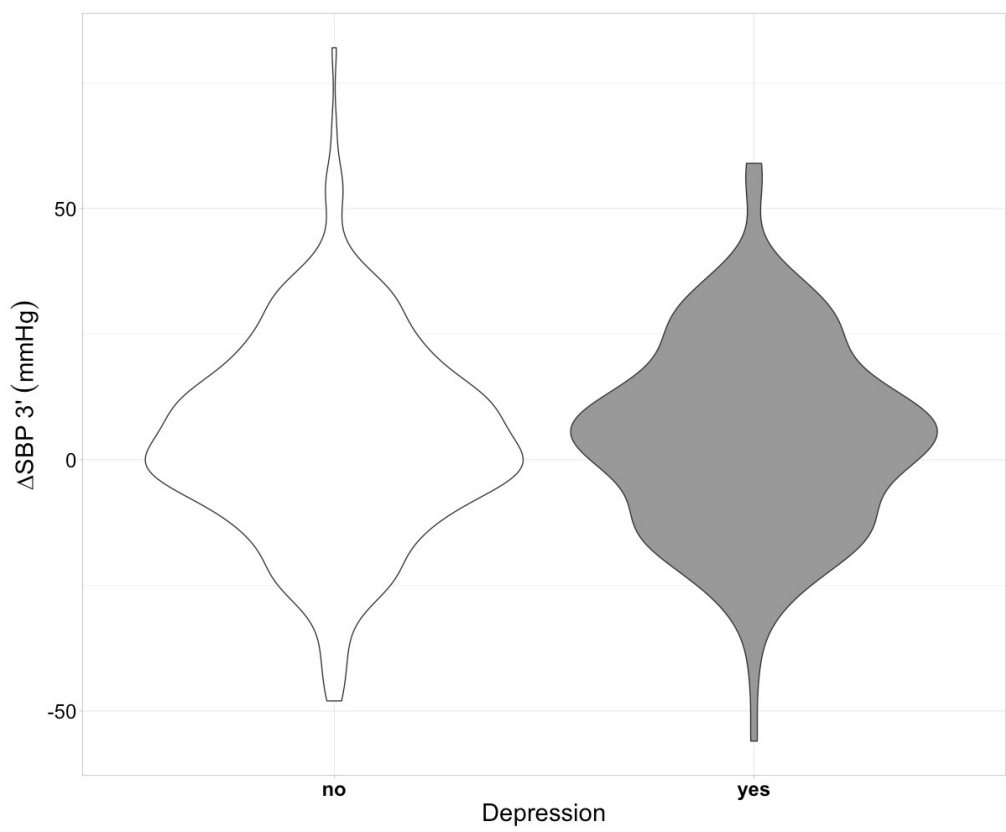

Supplement: 12877_2022_2844_MOESM1_ESM.pdf [file 12877_2022_2844_MOESM1_ESM.pdf]
